# Supplementary material for: Reporting standards for guideline-based performance measures
Source: Springer Nature journal article supplement (doi:10.1186/s13012-015-0369-z), 2015-12-01

**GIN Reporting Standards: Final Version 12\_13 (Second DELPHI round)**

Invited: 27; participated: 12

**1. Criterion/Attribute**

a. State the currency of guidelines used for guideline based performance measure development and state if the guideline meets the criteria set out by the Guidelines International Network (G-I-N). Describe the guideline quality using a validated guideline assessment tool, such as AGREE II. b. Indicate additional sources, if used and the rationale for their use.

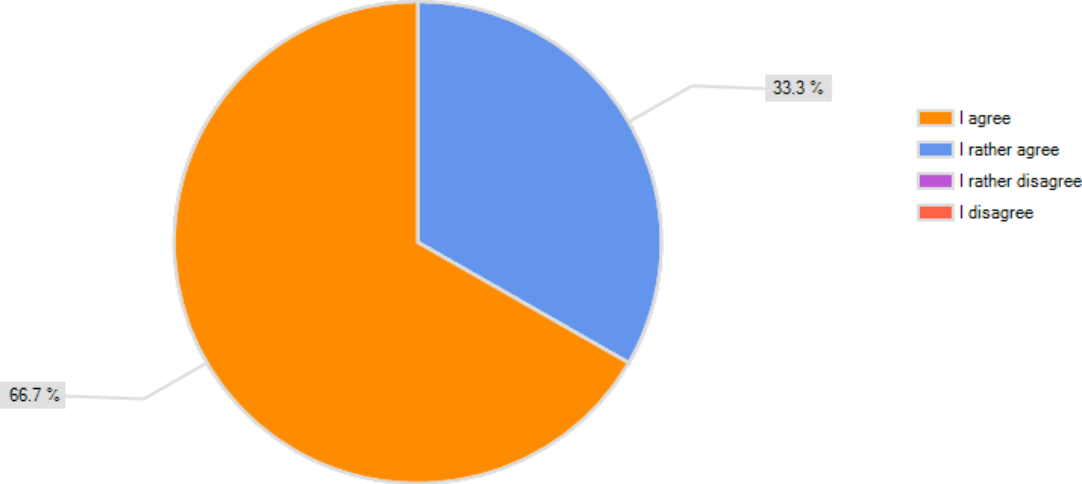

**2. Criterion/Attribute**

**State the strength of evidence and/or the grade of recommendation qualifying guideline recommendations to be used for guideline based performance measures.**

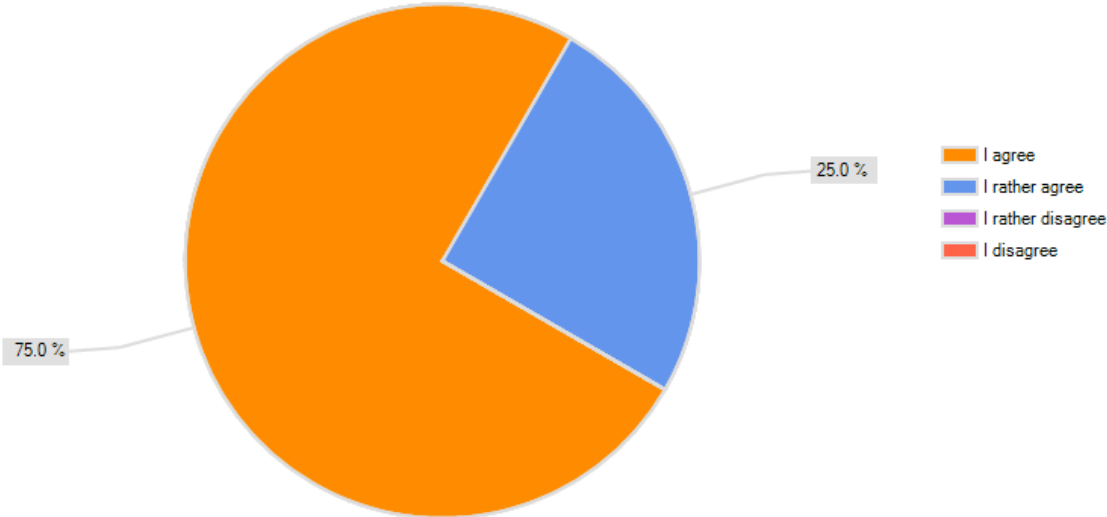

### 3. Criterion/Attribute:

Describe clearly and in detail the methods used to develop the performance measures from the supporting clinical guideline recommendations.

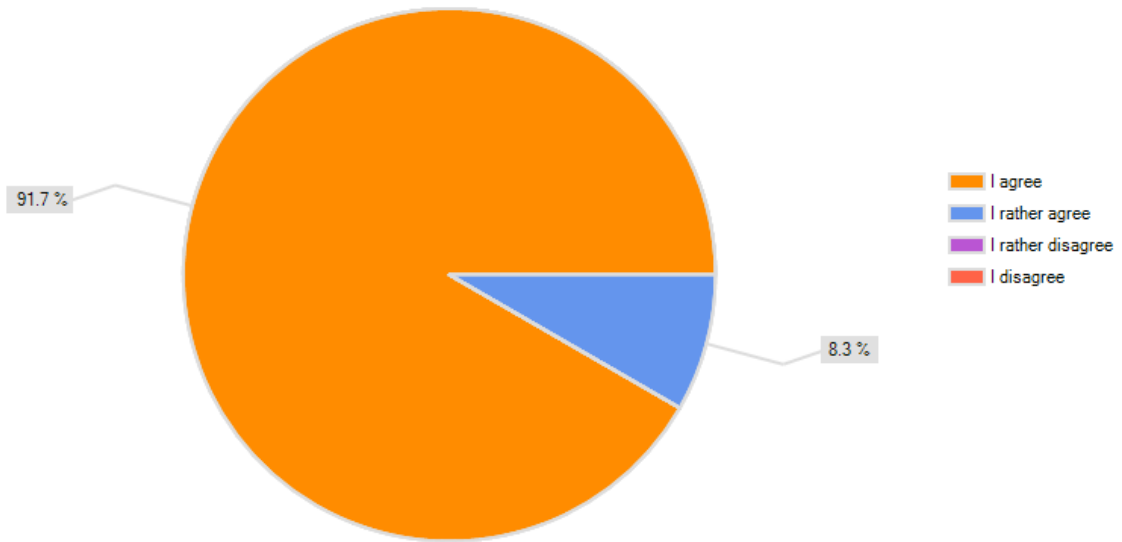

#### 4. Criterion/attribute:

State, if the following attributes within the development process of guidelines based performance measures were considered: • Relevance (as a minimum: potential for improvement/clinical relevance) • Scientific Soundness (as a minimum: the evidence supporting the measure) • Feasibility (as a minimum: clarity of definition and measurability)

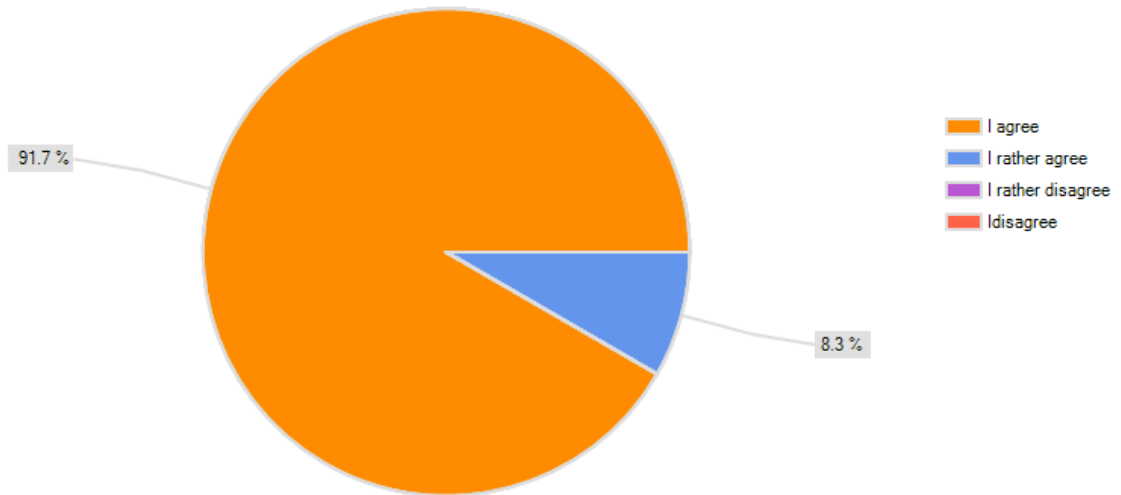

## 5. Criterion/Attribute

State if the numerator and denominator of the guideline based performance measure is specified unambiguously and in detail

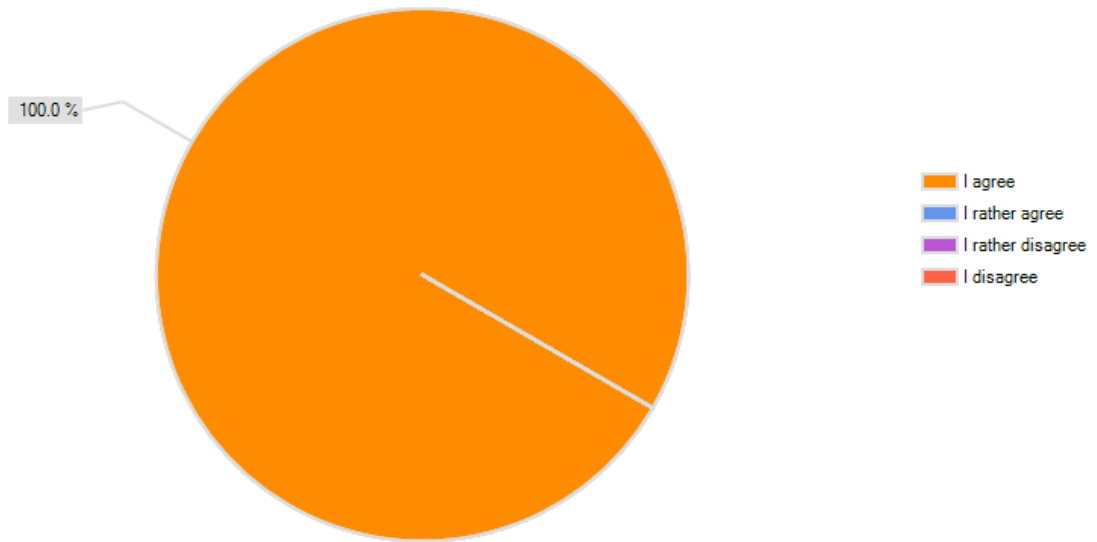

State if there is a clear description of the intended use of the performance measure (quality improvement, quality assurance with or without accountability purposes, pay for performance) and at what level in the health system it is used (local, regional, national).

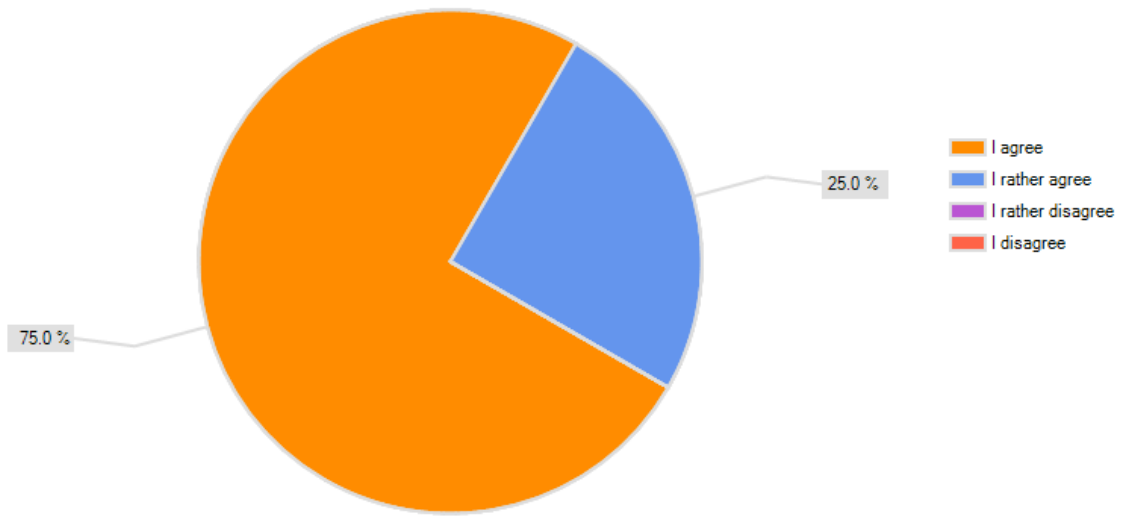

**Criterion/Attribute**

**6. Criterion/Attribute**

## 7. Criterion/Attribute

If a practice test ("piloting") is carried out prior using the guideline based performance measure, provide a full description of the process. If no practice test is done provide the reason therefore. Provide information about any other validation process in use.

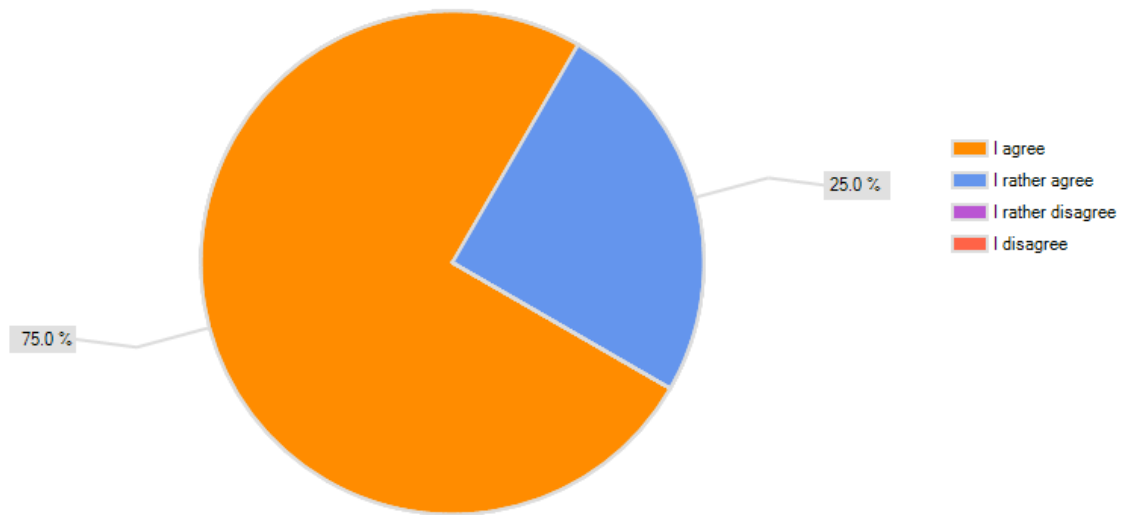



## 8. Criterion/Attribute

Report the currency of the performance measures in use. State the criteria for deciding to change or stop using performance measures.

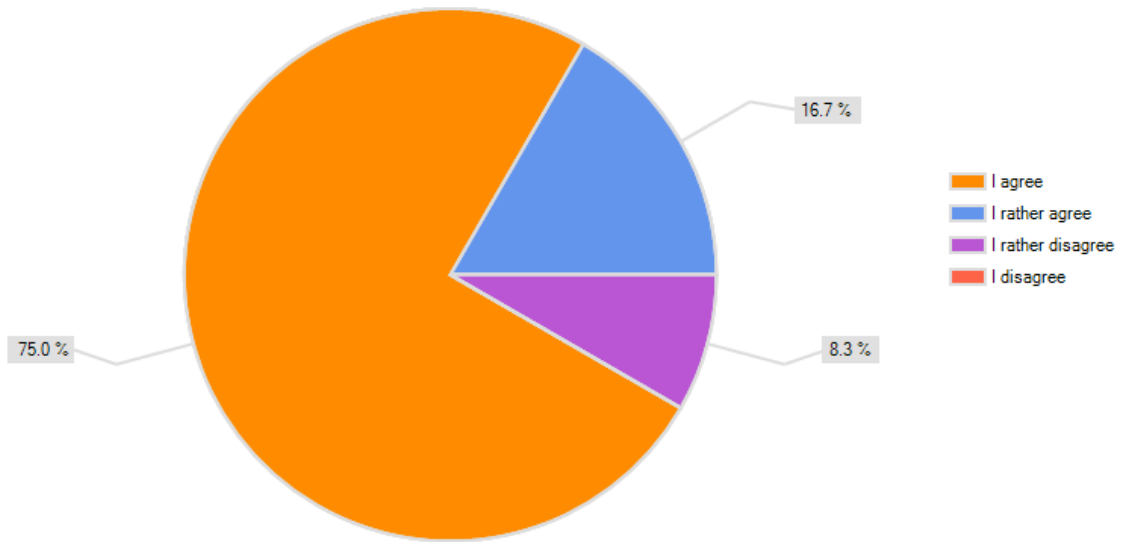

## 9. Criterion/Attribute

Describe clearly the composition of the panel deciding on guideline based performance measures with information on participation of multidisciplinary experts, stakeholders in the field, experts in quality measurement and patient representatives.

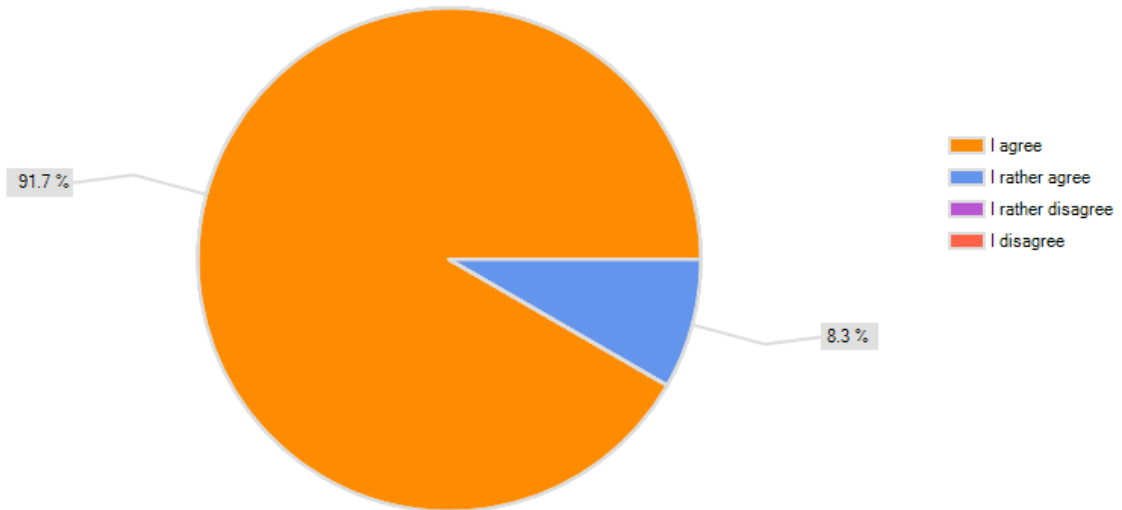

**Please assess the importance of the criteria/attributes for guideline based performance measures**

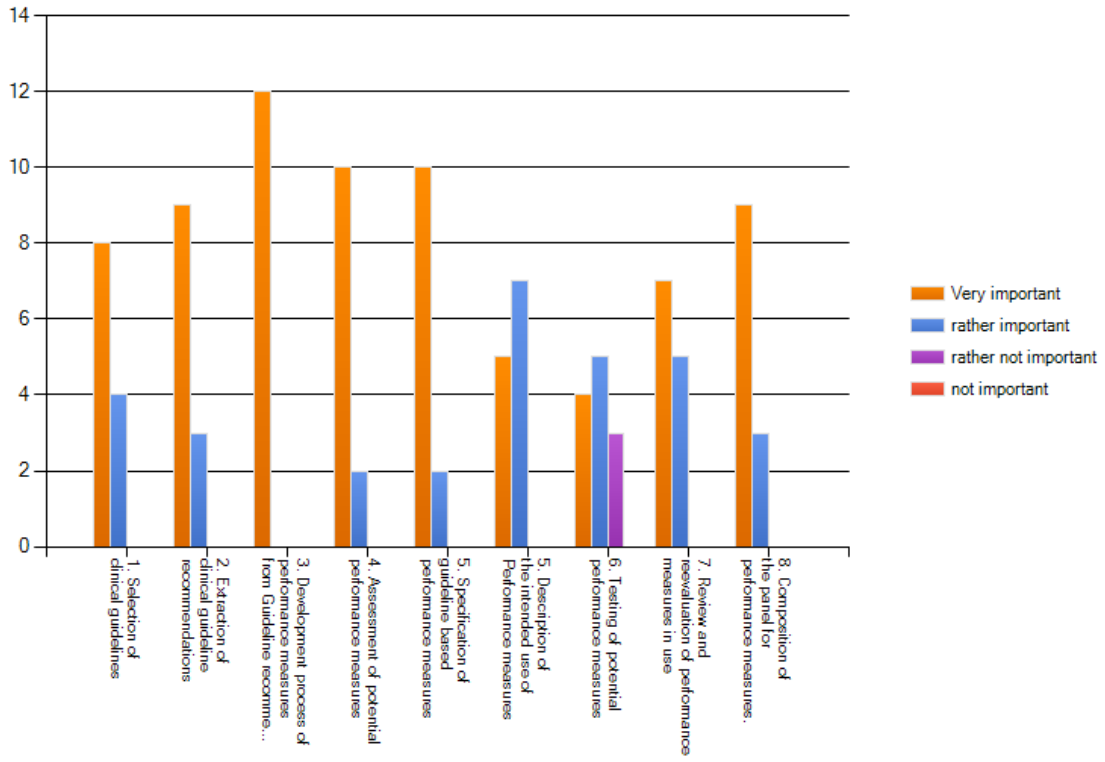

Supplement: MOESM4 [file 9773274]
